# Supplementary material
Source: PubMed Central journal article supplement (PMC2707922)
Supplement: NIHMS95694-supplement-Suppl__Fig.pdf [file NIHMS95694-supplement-Suppl__Fig.pdf]

Cancer Cell, Volume 14

## **Supplemental Data**

### **Article**

**Hepatocyte Necrosis Induced by Oxidative Stress**

**and IL-1 $\alpha$  Release Mediate Carcinogen-Induced**

**Compensatory Proliferation and Liver Tumorigenesis**

**Toshiharu Sakurai, Guobin He, Atsushi Matsuzawa, Guann-Yi Yu, Shin Maeda,  
Gary Hardiman, and Michael Karin**

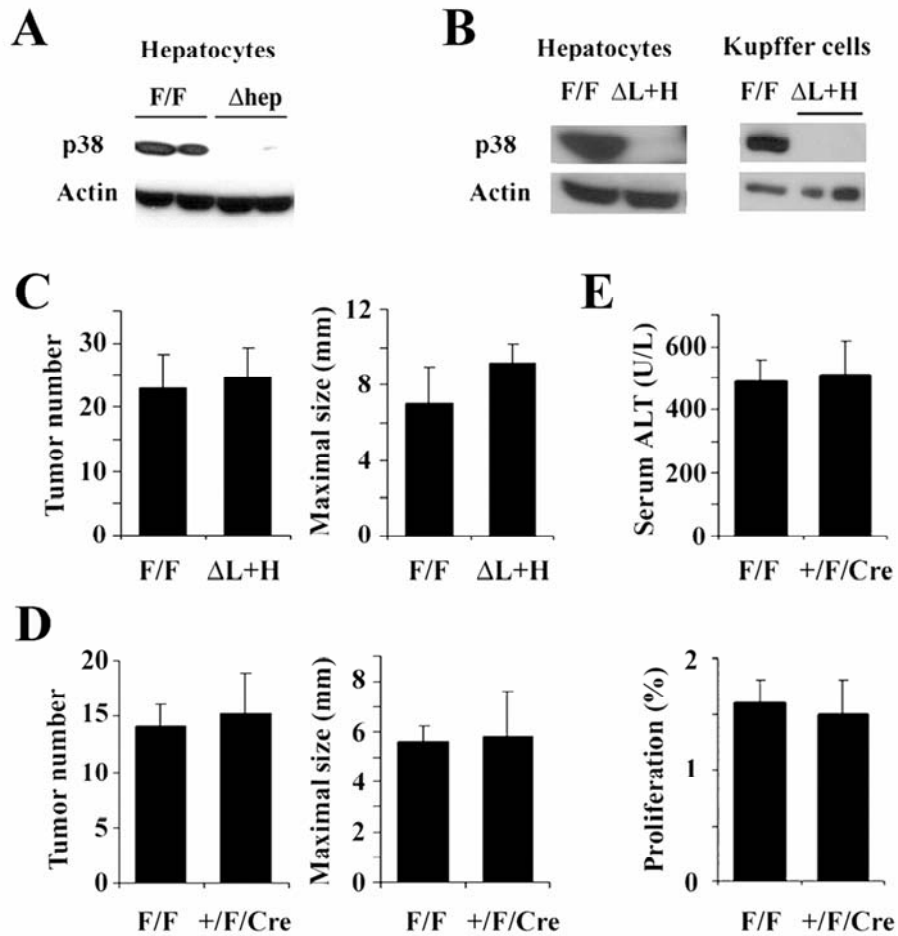

### Figure S1. Characterization of p38 $\alpha$ Conditional Deletions

(A) Extracts of primary hepatocytes from  $p38\alpha^{\Delta hep}$  and  $p38\alpha^{F/F}$  control mice were analyzed by immunoblotting with the indicated antibodies.

(B) Extracts of primary hepatocytes and KC from  $p38\alpha^{\Delta L+H}$  and  $p38\alpha^{F/F}$  control mice were analyzed by immunoblotting with the indicated antibodies.

(C) Tumor multiplicity (>0.5 mm) and maximal tumor sizes (diameters) in livers of male  $p38\alpha^{F/F}$  (F/F, n = 5) and  $p38\alpha^{\Delta L+H}$  (n = 8). Results are means  $\pm$  SEM.

(D) Tumor multiplicity (>0.5 mm) and maximal tumor sizes (diameters) in livers of male  $p38\alpha^{F/F}$  (F/F, n = 15) and  $p38\alpha^{+F}/Alb-Cre$  (n = 4) mice. Results are means  $\pm$  SEM.

(E) ALT in serum was measured 48 hrs after DEN injection and extent of compensatory proliferation was determined by BrdU labeling. Results are means  $\pm$  SEM (n = 3).

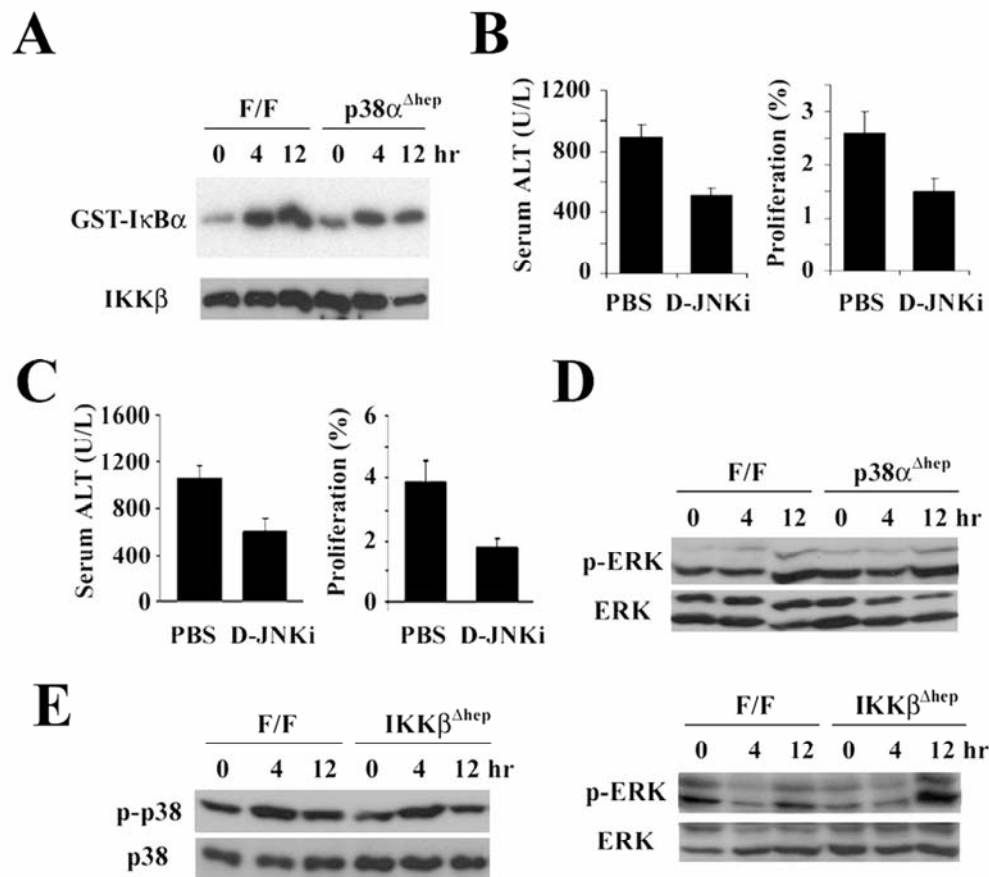

### Figure S2. Effect of p38 $\alpha$ Ablation on Activity of Other Protein Kinases

(A) Mice were given DEN and their livers isolated at the indicated times and homogenized. IKK activity was determined by immunocomplex kinase assay with GST-I $\kappa$ B $\alpha$  as a substrate. Protein recovery was determined by immunoblotting.

(B and C) Effects of JNK inhibitor (D-JNKi) on cell death and compensatory proliferation.

Serum ALT levels and extent of compensatory proliferation determined by BrdU labeling were examined in p38 $\alpha^{\Delta hep}$  (B) and Ikk $\beta^{\Delta hep}$  mice (C) 48 hrs after DEN administration. Either PBS or D-JNKi (20 mg/kg) was given before DEN treatment. Results are means  $\pm$  SEM (n = 4).

(D and E) Mice were given DEN and their livers isolated at the indicated times and homogenized. ERK and p38 phosphorylation were analyzed by immunoblotting.

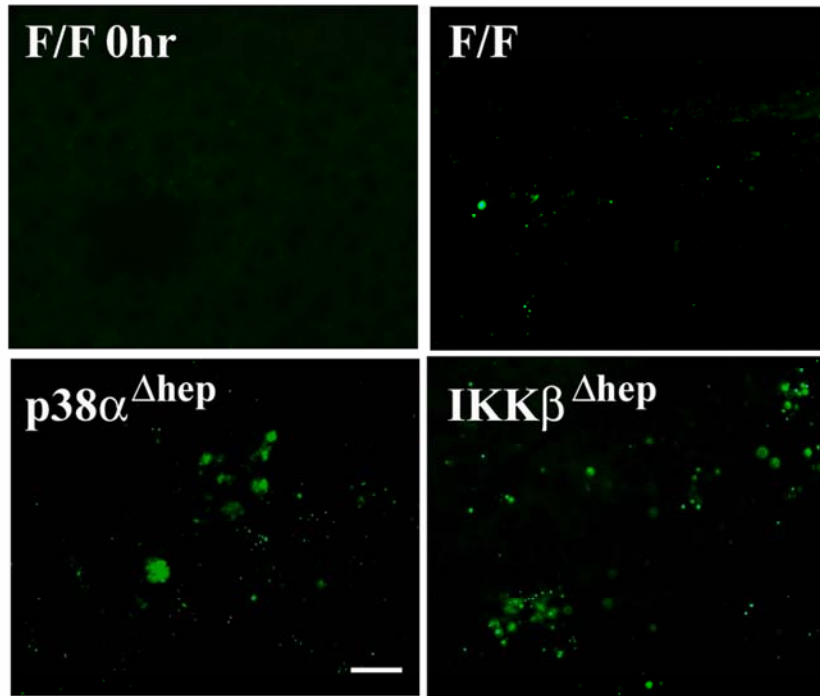

**Figure S3. Enhanced H<sub>2</sub>O<sub>2</sub> Accumulation in *p38α<sup>Δhep</sup>* and *Ikkβ<sup>Δhep</sup>* Mice**

Liver cryosections prepared before (0 hr) and 6 hrs after DEN injection into mice of the indicated genotypes were incubated with 5 μM 5-[and-6]-chloromethyl-2',7'-dichlorodihydrofluorescein diacetate for 30 min at 37°C. Cells staining positively for the oxidized dye were identified by fluorescent microscopy. Scale bar = 50 μm.

## Cell Death

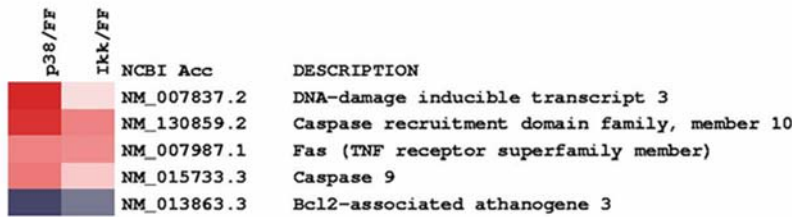

## Cell Cycle and Transformation

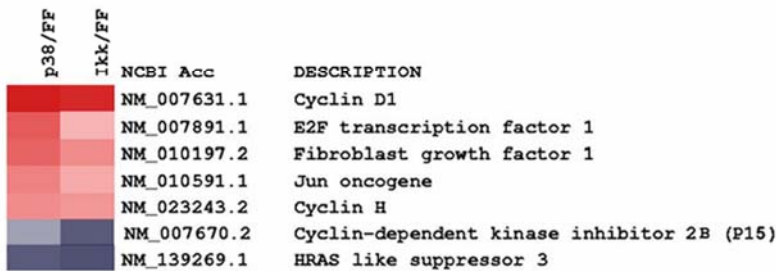

## Angiogenesis

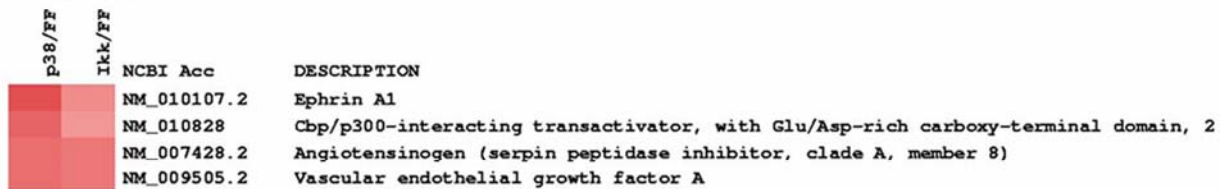

## Protein Kinases

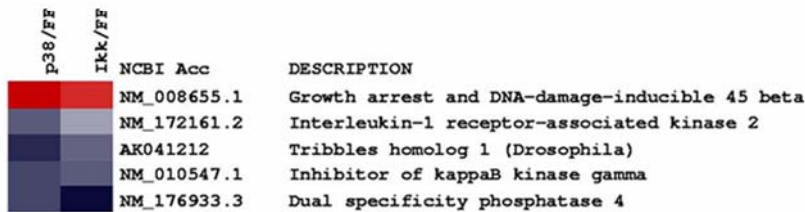

## Heat Shock Response

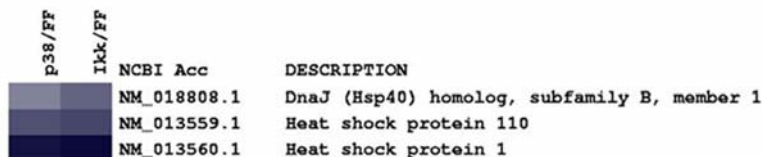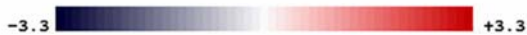

Figure S4.

### Figure S4. Expression Profiling of $p38\alpha^{Ahep}$ , $Ikk\beta^{Ahep}$ , and Control Livers (n = 3)

Total liver RNA was extracted 4 hrs after DEN administration and gene expression profiling was conducted using microarray analysis with whole-genome oligonucleotide arrays. Genes whose expression was altered by more than 1.5-fold with a p-value < 0.05 upon  $p38\alpha$  or  $Ikk\beta$  deletion were categorized as shown. Positive or negative numbers represent fold-changes in  $p38\alpha^{Ahep}$  or  $Ikk\beta^{Ahep}$  livers relative to  $p38\alpha^{F/F}$  or  $Ikk\beta^{F/F}$  livers, respectively.

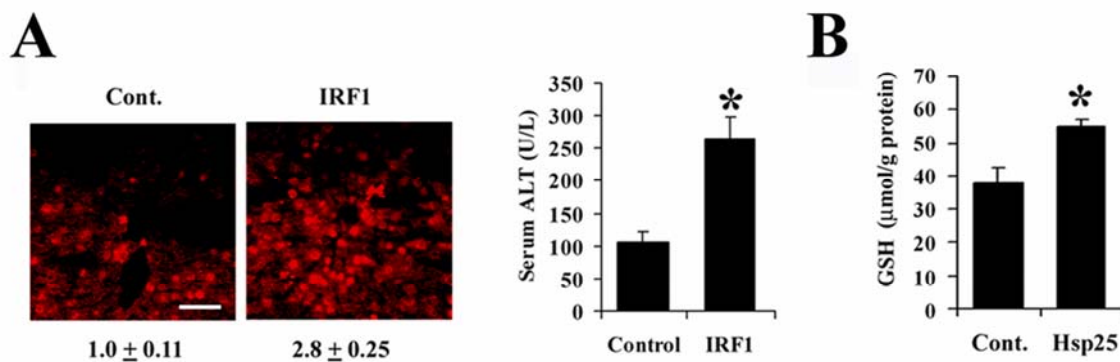

### Figure S5. Effects of IRF1 and Hsp25 on ROS, Liver Damage, and GSH

(A)  $p38\alpha^{F/F}$  mice were infected with adenovirus expressing IRF1 or a control adenovirus and after 20 hrs were injected with DEN. Liver cryosections prepared 8 hrs later were incubated with 2 mM dihydroethidine hydrochloride for 30 min at 37°C. Cells staining positively for the oxidized dye were identified by fluorescent microscopy. Scale bar = 50  $\mu$ m. The numbers at the bottom are mean fluorescent intensity  $\pm$  SEM. Serum ALT levels were also measured 8 hrs after DEN injection. Results are means  $\pm$  SEM (n = 4). \*p < 0.05 vs. control mice.

(B)  $p38\alpha^{Ahep}$  mice were infected with adenovirus expressing Hsp25 or a control adenovirus. After 20 hrs the mice were given DEN and 24 hrs later liver lysates were prepared and GSH content was measured. Results are means  $\pm$  SEM (n = 4). \*p < 0.05 vs. control mice.

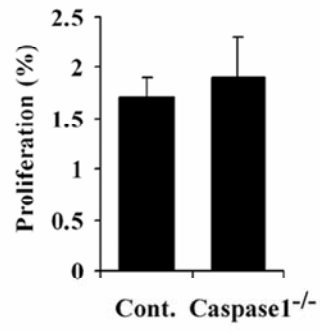

**Figure S6. Compensatory Proliferation in *Caspase-1*<sup>-/-</sup> Mice**

Extent of compensatory proliferation was determined by BrdU labeling in control and *Caspase-1*<sup>-/-</sup> mice 48 hrs after DEN injection. Results are means  $\pm$  SEM (n = 3).

**Table S1. Genes with Altered Expression Levels in  $p38\alpha^{Ahep}$  and  $Ikk\beta^{Ahep}$  Livers**

| Gene   | Accession Number | Description                                                      | $p38\alpha^{\Delta F}$ | $IKK\beta^{\Delta F}$ |
|--------|------------------|------------------------------------------------------------------|------------------------|-----------------------|
| 14262  | NM_008030.1      | Flavin containing monooxygenase 3                                | 4.9688                 | 7.4163                |
| 17873  | NM_008655.1      | Growth arrest and DNA-damage-inducible 45 beta (Gadd45 $\beta$ ) | 3.2574                 | 2.288                 |
| 104943 | NM_027828.2      | RIKEN cDNA 9030611O19 gene                                       | 2.9666                 | 1.8347                |
| 269344 | NM_145973.2      | adult retina cDNA, RIKEN clone:A930015D22 productprotein         | 2.681                  | 1.4873                |
| 12443  | NM_007631.1      | Cyclin D1                                                        | 2.3348                 | 2.2221                |
| 16362  | NM_008390.1      | Interferon regulatory factor 1                                   | 2.3031                 | 1.2747                |
| 13198  | NM_007837.2      | DNA-damage inducible transcript 3 (Chop)                         | 2.1638                 | 1.4516                |
| 13122  | NM_007824.2      | Cytochrome P450, family 7, subfamily a, polypeptide 1            | 1.9945                 | 2.5534                |
| 13555  | NM_007891.1      | E2F transcription factor 1                                       | 1.8644                 | 1.2745                |
| 14102  | NM_007987.1      | Fas (TNF receptor superfamily member)                            | 1.4666                 | 1.2777                |
| 22339  | NM_009505.2      | Vascular endothelial growth factor A                             | 1.45                   | 1.4061                |
| 277753 | NM_177406.2      | Cytochrome P450, family 4, subfamily a, polypeptide 12           | -3.9136                | -5.5372               |
| 15507  | NM_013560.1      | Heat shock protein 1 (Hsp25)                                     | -2.5401                | -1.2962               |
| 15368  | NM_010442.1      | Heme oxygenase (decycling) 1                                     | -1.8324                | -1.9963               |
| 232174 | NM_175475.2      | 14, 17 days embryo head cDNA, RIKEN clone:3221401J18             | -1.809                 | -2.4473               |
| 319520 | NM_176933.3      | Dual specificity phosphatase 4 (MKP2)                            | -1.7999                | -2.8351               |
| 15505  | NM_013559.1      | Heat shock protein 110                                           | -1.7509                | -1.8271               |
| 12575  | NM_007669.2      | Cyclin-dependent kinase inhibitor 1A (p21)                       | -1.6014                | -1.6667               |
| 69134  | NM_183278.1      | RIKEN cDNA 2200001I15 gene                                       | -1.3865                | -3.3427               |

Expression profiling of  $p38\alpha^{Ahep}$ ,  $Ikk\beta^{Ahep}$ , and control livers (n = 3). Liver RNA extracted 4 hrs after DEN administration was analyzed using whole-genome oligonucleotide arrays. Genes whose expression is substantially and consistently altered upon deletion of  $p38\alpha$  or  $IKK\beta$  are listed. Positive and negative numbers represent fold changes in expression (up or down, respectively) in  $p38\alpha^{Ahep}$  or  $Ikk\beta^{Ahep}$  mice relative to the corresponding floxed strains.
